# Supplementary material for: A nociceptor-specific RNAi screen in Drosophila larvae identifies RNA-binding proteins that regulate thermal nociception
Source: PeerJ. 2025 Jan 21;13:e18857. doi: 10.7717/peerj.18857 (PMC11759608; doi:10.7717/peerj.18857)
Supplement: Supplemental Information 1 — Thermal nociception response latency for each animal tested in all thermal nociception experiments. The data are organized by figure panel and genotype. [file peerj-13-18857-s001.xlsx]

## Sheet: Figure 1. Raw Screen Data
GENES (alphabetical order)
alan shepard-RNAi			aret-RNAi			aub-RNAi			B52-RNAi			bancal-RNAi			brat-RNAi			caper-RNAi			CG2926 RNAi			Ssx RNAi			CG4119 RNAi			Wdfy2 RNAi			CG5439 RNAi			CG5589 RNAi			mRF1 RNAi			CG5728 RNAi			fand RNAi			CG6418 RNAi
CG32423			CG31762			CG6137			CG10851			CG13425			CG10719			CG11266			CG2926			CG3056			CG4119			CG5168			CG5439			CG5589			CG5705			CG5728			CG6197			CG6418
VDRC 37863 GD			VDRC 107459 KK			BDSC 35201			VDRC 38860 GD			VDRC 105271 KK			VDRC 105054 KK			NIG CG11266			VDRC 33589 GD			NIG CG3056			VDRC 26395 GD			VDRC 110451 KK			NIG CG5439			VDRC 108642 KK			VDRC 108376 KK			BDSC 55916			VDRC 104186 KK			VDRC 108552 KK
n:	36		n:	24		n:	45		n:	48		n:	45		n:	32		n:	32		n:	37		n:	25		n:	37		n:	38		n:	52		n:	32		n:	40		n:	34		n:	25		n:	37
mean:	3.54722		mean:	5.26667		mean:	2.57333		mean:	3.61875		mean:	5.21111		mean:	3.75313		mean:	4.58125		mean:	2.76216		mean:	4.056		mean:	4.75946		mean:	3.76316		mean:	2.67115		mean:	4.4		mean:	2.97		mean:	3.84118		mean:	4.988		mean:	3.82973
Std Dev:	2.04443		Std Dev:	2.96482		Std Dev:	1.05839		Std Dev:	2.57745		Std Dev:	2.39338		Std Dev:	2.33735		Std Dev:	2.25767		Std Dev:	1.66472		Std Dev:	2.04513		Std Dev:	2.77183		Std Dev:	2.59994		Std Dev:	1.48223		Std Dev:	2.13481		Std Dev:	1.32417		Std Dev:	2.66312		Std Dev:	2.91094		Std Dev:	2.04897
3.3			6.3			2.8			3.5			6			5.2			3.8			1.2			7.3			2.5			2.1			1.7			3.8			1.5			5.5			11			4.2
6.8			11			3.3			6.5			4.6			4.3			2.1			1.1			2.3			3.8			2.8			1.4			6.1			2			2.9			3.4			1.6
3.7			8.4			2			2			2.4			3.6			2.8			2.5			2.5			11			0.9			2.6			3.2			1.9			3.4			3.9			1
3.5			6.1			2.4			9.9			2.8			11			6.5			2.1			2.1			5.2			2.1			1.5			4.3			2.4			4.3			9.1			1.8
5.7			1.6			5.6			6.9			6.5			2.7			1.5			4.4			1.2			4.6			11			1.8			3.5			2.5			5.4			5.7			3.3
2.8			3.5			1.4			4.2			2.2			3.8			5.5			1.5			3.2			4.4			5.4			3			2.8			2.7			2.4			5.8			2
2.2			5.6			1.4			6.3			3.5			5.2			3.6			1.6			6.5			3.5			11			3			4.4			2.6			3.3			2.3			3.3
4.1			7.3			2			3.1			4.2			1.8			2.9			2.8			4.8			4.7			2.9			1.6			6.6			1.9			3.7			3.7			3.1
5.9			11			1.5			5.5			6.7			3.2			6.2			2.1			5.8			1.1			6.1			1.4			2.4			1.4			1.6			2.3			3.8
2.5			5			1.2			1			3.4			4.4			4.6			1.2			8.6			5.3			1.3			3.4			4.4			2.5			1.4			3.8			8.6
3.9			4.3			2.3			1.2			1.3			2.1			2.3			5.2			3.5			4.3			1.6			1.9			2.7			2.5			3.2			4.9			3.7
11			2.3			3			2.6			7.4			2.7			5.9			2.5			2.4			2			5.3			2.3			2.8			1.3			4.8			4.4			3.6
2.2			6.2			5.6			2.6			2.8			3.4			11			3.8			3.8			6.6			11			2.5			3.9			1.8			3.5			8.8			3.7
3.4			3			3.6			4.9			2.8			3.8			3.6			1.8			4.4			1.6			3.2			2.5			1.7			3.1			11			10.6			6.6
6.5			1.3			2.7			2.1			2.9			1.4			3.6			1.4			2.9			2.1			3.6			3.8			5.3			4.6			5.7			3.6			2.8
2.2			3.1			4.3			2.8			2.3			1.4			7.7			2.6			4.2			1.3			3.1			6.6			4.1			2.7			2.6			5.4			1.9
1.8			3.3			3			2			8.3			1.7			5.8			2.5			1.2			8.9			3.4			3.2			3.8			2.6			3.4			5.7			2.1
2.7			7.7			2.9			11			7.5			4			3.3			9			6.8			11			3.6			1.5			6			1.3			3.1			2.7			3.6
3.4			11			3			4.5			5.4			1.4			11			2.2			3.1			3.2			3.1			5.8			11			4.8			2.8			2.6			2.6
1.8			2.8			2.4			4.5			3.6			5.4			5.8			3.6			2.8			4.5			2.4			4.7			4			1.8			3.3			2.6			3
1.1			6.4			1.5			11			8.2			4			1.8			3.6			4.4			3.6			3.4			1.5			2.9			3.6			3.8			1.6			2.9
1.2			3.9			2.2			11			3			5.9			1.9			4.1			7.8			8.6			4.1			5.3			4.1			5			1.5			5.2			3.3
1.3			3.7			1.5			1.3			6.5			3.4			5.3			1.6			4.4			2.4			2.6			1.5			11			4.3			11			2.6			11
1.8			1.6			2.1			1.3			5.2			11			5.5			3.2			3.3			6.5			4.4			0.9			4.6			2.9			2			11			2.1
2.2						4.8			2.6			5.9			1.5			3.1			2.9			2.1			4.6			3.4			2.3			6.2			1.1			3			2			3.5
2.3						2.7			3.3			5.3			1.9			4.9			2.8						8.4			5.3			1.4			2.6			5.2			7.6						4.2
6						2.3			2.5			3.9			3.8			3.6			6.4						3.5			4.3			1.3			1.2			3.4			1						3.8
4.3						3.2			1.9			11			4.7			3.9			3.8						1.9			2.2			5.1			4			3.8			2.5						3.3
2.4						3.2			3.4			11			1.3			4.8			1.3						2.9			1.4			1.4			4.4			3.5			2.3						3.8
3.5						3			3.4			7.3			1.4			3.3			1.1						5.8			2.1			2.6			4.2			3.4			1.4						2.7
3.3						3.1			1.1			6			4.1			4.9			1.6						6.2			4.3			1.7			3.7			2			2.2						5.8
6.3						2.3			1.9			6.9			4.6			4.1			3.5						2.4			1.6			2.2			5.1			5.5			2.5						6.1
2.6						2.9			2.1			4.3									2						11			1.4			1.2						7.2			1.5						4.5
1.5						1.5			2.5			4.1									1.4						6.4			1.2			1.1						3.9			11						7.3
5.3						1.4			2.3			1.5									1.3						4.1			2.6			4.8						2.5									4.4
3.2						1.6			4.2			4.9									4.9						0.9			1.7			3.4						2.8									5.5
						1.7			3.3			6.4									1.6						5.3			7.6			2.7						3.4									1.2
						1.8			2.1			9.2																		3.5			4.9						1.8
						1.1			2.4			3.4																					1.3						3.4
						1.9			1.4			3.4																					2.4						2.2
						3.6			1.7			6.1																					5
						3.5			2.6			8.8																					3.5
						2			4.1			7.5																					2.2
						2.4			3.7			4.4																					1.2
						2.1			2.1			3.7																					1.1
									2.7																								3.1
									3.2																								6.6
									1.5																								2
																																	1.9
																																	1.5
																																	2.9
																																	2.7

## Sheet: Figure 1A Chart Data
	Latency (s)	stdev	n
CG11360	1.938	0.877	29
eIF3f1	2.003	0.936	32
pea	2.044	0.831	27
crn	2.241	1.134	27
Lsm11	2.319	0.701	21
pum	2.327	1.139	41
eEF1α1	2.409	1.423	46
U2af50	2.425	1.092	24
eIF4EHP	2.437	0.945	27
DIP1	2.452	0.805	27
eIF4E4	2.455	0.245	40
CG14641	2.455	1.111	29
CG10418	2.5	0.825	29
Spf30	2.56	1.408	35
snRNP-U1-C	2.61	0.96	30
snRNP-U1-70K	2.621	1.142	39
pitchoune	2.636	1.158	28
CG5439	2.671	1.482	52
loquacious	2.677	1.428	39
Prp6	2.695	1.269	20
rump	2.737	1.886	38
CG2926	2.762	1.665	37
hpf	2.815	1.374	26
hay	2.82	1.777	25
yw; attp (WT)	2.82918	1.28427	281
swm	2.832	1.099	53
eIF4B	2.85	1.57613	26
xl6	2.914	1.287	43
mRF1	2.97	1.324	40
how	2.987	1.422	31
RpS3	3	1.953	12
y v; attP40, y+ (WT)	3.02407	1.41367	54
ddx1	3.03	1.343	37
W[1118] (WT)	3.04306	1.35749	72
mib2	3.06	1.217	25
isoW (WT)	3.07984	1.37806	243
CG7903	3.083	1.164	42
Dbp73D	3.194	1.508	31
nos	3.317	1.784	36
CG6999	3.34	1.681	50
dom	3.346	1.051	26
squid	3.358	1.588	38
Brr2	3.39	1.272	30
Gemin3	3.456	2.32	16
eIF3i	3.46	2.304	35
ps	3.486	2.017	49
CG11334	3.507	1.28	30
Prp5	3.509	1.515	43
SF3a1	3.526	1.676	35
alan shepard	3.547	2.044	36
Hel25E	3.613	2.804	30
B52	3.619	2.577	48
rasputin	3.632	1.6	41
eIF3b	3.719	2.269	43
Hrb87F	3.725	1.575	40
brat	3.753	2.337	32
Wdfy2	3.763	2.6	38
Srp54	3.776	2.146	25
CG6418	3.83	2.049	37
Dbp45A	3.84	2.168	25
CG5728	3.841	2.663	34
eIF2β	3.863	2.499	32
Dcr-1	3.865	1.768	34
tst	3.958	1.977	24
eRF1	4	2.414	34
Spargel	4.043	1.626	30
Ssx	4.056	2.045	25
mub	4.078	1.831	55
Gr98d	4.134	2.442	44
CG18259	4.155	1.812	42
U2af38	4.198	2.886	41
CG14718	4.246	1.718	28
smooth	4.296	2.615	46
mask	4.313	2.683	68
CG6961	4.395	1.836	42
CG5589	4.4	2.135	32
mahe	4.449	1.82	35
caper	4.581	2.258	32
Set1	4.617	2.497	42
eEF1α2	4.691	1.653	44
CG4119	4.759	2.772	37
fand	4.988	2.911	25
CG32706	5.067	2.646	30
eIF1A	5.179	3.079	29
bancal	5.211	2.393	45
aret	5.267	2.965	24
drosha	5.337	1.885	35
fne	5.394	3.529	33
Larp4B	5.668	2.42	41
CG10445	5.768	2.956	19
eIF3g1	5.795	2.795	38
Cpsf6	5.833	3.365	30
eIF2α	6.236	2.868	45
snf	6.326	3.25	23
mbl	6.733	2.904	49
SC35	7.104	3.187	47
eIF4a	8.05	3.33	23
para	11	0	245
			3878
			40.3958

## Sheet: Figure 1B Chart Data
	Latency (s)	stdev	n
eIF3h	1.615	0.602	54
Doa	1.81	1.311	48
Rm62	1.816	0.851	50
glo	2.264	1.224	47
Rox8	2.296	1.372	48
orb	2.395	1.173	42
Saf-B	2.434	1.747	47
eIF4E1	2.53077	1.30488	39
y v; attP2, y+ (WT)	2.53858	1.38868	127
aub	2.57333	1.05839	45
smaug	2.658	1.207	45
eIF3k	2.72667	1.26544	30
eIF5	2.78182	1.22766	33
Dcr-2	2.893	1.576	43
eIF4G1	3.07895	1.24665	38
eIF5B	3.0931	2.02871	29
eIF4E3	3.11471	1.23021	34
elav	3.434	1.513	41
eIF4G2	5.05152	2.8431	33
eif4AIII	5.30571	3.0962	35
para	11	0	245
			840

## Sheet: Figure 1C Chart Data
	isoW	yw; attp	y v; attP2, y+	y v; attP40, y+	w1118
	2.3	1.4	1.8	2.2	2
	2.1	1.6	5	1.8	2.3
	1.9	1.9	3.4	0.9	3.3
	1.5	2.5	1.7	2.9	3.1
	3.1	1.5	2.5	2.5	5
	1.5	1.6	1.2	3.9	2.8
	1.9	3.1	2.4	3.7	2.9
	1.5	1.2	2	2.4	3.7
	3.1	6.5	3.3	2	3.8
	1.6	3.5	3.7	1.9	1.9
	1.9	4.7	4.2	1.9	5.5
	1.6	2.1	1.4	2.5	2.6
	1.6	2.4	1.5	4.7	6.8
	1.2	8.6	4.7	3.2	2.9
	3.5	1.8	1.5	1	2.7
	2.1	3.5	3.8	5.3	4.3
	1.1	1.1	4.1	1.3	4.3
	2.3	2.3	2.8	1.8	3.3
	2.3	2.7	1.7	3.1	2.1
	3.2	2.9	1.8	2.6	2.2
	2.4	5.7	2.6	2.3	3.8
	5.7	5.6	3.1	8	1.6
	2.7	2.3	1.8	1.1	4.1
	2.5	7.5	3.2	2	3.6
	2.4	3.2	1.7	5.4	1.5
	3.1	1.5	3.7	1.5	4.5
	4	7.6	1	3.3	2.3
	1.1	2.9	3.1	1.3	2.8
	1.3	6.7	3.8	1.5	2.9
	6.1	0.6	2.5	3.5	2
	3.3	2.6	2	1.6	4.6
	3.6	1.1	5.1	4.1	1.7
	3.5	1.4	3.3	2.9	3.2
	2.3	3	1.2	3.7	3.5
	2.4	2.5	2.8	2.9	5.8
	1.2	3.1	1.2	3.7	3.2
	2.9	3.2	2.9	3.5	5.6
	0.9	2.1	2.8	3.8	5.1
	2.8	3.6	4.2	2.3	4.5
	3.7	2.5	1.2	4.6	1.3
	1.5	3.2	1.4	2.4	5.7
	2	2.1	4	3.9	2.4
	1.2	3.4	3.2	2.6	5.3
	1	3.4	5.4	3.4	4.1
	2.9	2.1	2.4	5.5	3.9
	1.5	1.7	3.9	2.6	4
	1.4	2.8	2.1	2.3	2.8
	2.6	5.2	1.1	6.7	1.4
	1.3	1.9	1.5	3.4	3.7
	1.9	2.3	1.7	4.2	1.5
	3.5	3.5	3.3	3.8	4.6
	3.2	4.3	1.5	3.2	3
	3.1	2.7	0.8	2	2.4
	2.4	2.4	2.3	2.7	3.8
	2.8	3.5	1.3		1.4
	3.5	2.6	1		2.5
	2.6	1.3	2.8		2
	3.5	1.3	2.7		2.6
	3.9	3.1	2.5		1.3
	2.5	2.8	1.5		1.3
	2.1	3.7	1.6		3.2
	3.1	4.2	1.1		3
	1.5	2.1	2.9		1.5
	4.6	2.4	0.9		1.4
	2.8	3.7	1.5		4.4
	4.4	5.7	1		2.8
	3.9	2	1.8		1.4
	3.1	4.5	1.3		1.4
	2.3	1.6	2		1.2
	3.3	1.6	2		1.2
	2.4	1.5	1.8		1.4
	3.8	2.7	0.9		1.4
	3.2	1.2	3.3
	3.6	3.1	1.1
	2.3	1.6	1.2
	3	1	2.8
	3.8	3.6	1.5
	2.4	3.1	2.8
	5.6	3.6	2.3
	5	1.2	2
	1.3	3.3	1.7
	3.4	3.8	3.1
	4.1	2.1	1.3
	4.1	2.9	2.8
	4.8	6.9	11
	3.3	2.5	2.8
	3.4	4.3	3.4
	2.2	1	3.9
	2.2	2.4	2.2
	4.2	5.9	2
	5.8	3.9	2.2
	1.7	4.2	2.5
	1.8	1.7	1.6
	3.1	5.5	1.4
	2.2	3.3	2
	3.6	4.4	1.2
	9.9	3.2	1.7
	3	2.9	2.6
	1.7	2.2	2.3
	6.7	2.5	3.7
	1.6	5	1.4
	1.6	4.7	5.9
	2.4	4.5	3.4
	4.5	3.8	1.5
	2.8	2.3	3
	3.3	3.2	1.6
	2.1	2.7	5.6
	1.9	3	2.6
	4.3	3.9	3.5
	5.7	4.9	3.4
	6.6	3.3	2.3
	5.5	4.5	0.7
	7.3	1.1	1.2
	2.8	2.4	3.2
	3.3	3.7	2.6
	4.4	4.2	2.7
	3.2	1.8	2.1
	2	1.9	4
	3.3	2.9	1.6
	3.4	2.8	1.7
	3	4.5	2.6
	3.4	2	3.5
	4.8	1.6	2.6
	3.8	3	2.5
	3.8	2.7	3.6
	3.6	2.5	1.4
	5.2	2.3	6.9
	5.7	2
	2.8	1.5
	1.8	1.6
	4.4	2
	3.1	3.1
	3.4	3.8
	2.7	2
	1.6	3.6
	2.3	3.1
	1.4	1.5
	2.5	3.2
	4.4	2.8
	3.4	2.1
	2.2	3.6
	2.1	2.1
	1.7	3.7
	2.2	1.7
	1.9	2.4
	2.5	2.7
	5.9	3.4
	5.5	3.2
	1.7	4
	1.4	2.6
	1.3	2.8
	2.2	3.3
	1.7	2.4
	3.5	3.8
	1.4	2.2
	5.3	1.5
	4.3	1.1
	3.5	1.6
	4.1	1.4
	1.6	1.5
	4.8	3.1
	2.4	1.8
	2.4	1.1
	2	1.8
	1.3	2
	3.7	8.3
	1.7	2.5
	2.8	2.9
	2.2	3.6
	2.8	1.2
	1.1	0.9
	3.9	2.8
	1.5	6.1
	6	1.9
	5.6	1.4
	3.1	2.9
	5.5	4.2
	2.2	1.9
	1.7	3.5
	1.5	2.8
	3	2.9
	5.1	1.6
	5.2	3.7
	4.7	2.8
	4.6	2.6
	4.2	1.7
	3.9	1.3
	3.5	1.7
	2.5	3.9
	5.4	2.4
	3.6	2.8
	1.1	1.3
	1.4	2.1
	4.4	3.1
	3.9	3.9
	3	6.2
	2	6.4
	2.7	2.8
	5.1	7.3
	3.1	3.7
	4.3	4.1
	3.8	7.2
	3.5	3.9
	4.7	3.5
	2.3	6.2
	1	3.9
	3.2	5.1
	2.8	6.5
	3.1	3.6
	2.9	3.3
	2.5	1.7
	2.6	3.7
	4.3	2.1
	2.1	2.1
	4.3	3
	3	1.9
	5	3.5
	1.6	1.2
	1.6	5.2
	3.9	1.9
	5.7	3.1
	3.1	2.3
	2.5	2
	5	2.8
	4.1	2.3
	3	4.1
	2.3	2
	1.9	4.5
	1.3	2.7
	4.6	1.8
	3.7	4
	1	2.9
	2.7	1.5
	1.6	3.3
	3.6	3.3
	2.4	2.6
	3.5	3.1
	2.7	1.2
	3.2	1.4
	3.2	3.6
	3.8	2
	4.4	4.2
	4.7	2.5
		3.2
		3.7
		1.1
		3.1
		2.6
		1.8
		4.7
		2.4
		7
		1.7
		4.1
		2.2
		2.8
		3.3
		2.9
		4.1
		2.8
		2.7
		2.3
		2.2
		2.1
		1.5
		1.2
		1.7
		4.1
		1.2
		3.2
		3.8
		1.9
		2.6
		2.9
		4.3
		5.8
		5.7
		4.6
		2.2
		7.4
		6.1
		5.5
		2.6
		6.1
		4
		1.8
		1.9
		2.7
		5.7
		3
		1.2
		4.8
		2.9
		3.2
		2.5
		1.4
		2.4
		2.5
		2.9
		1.7
		1.3
		3.4
		3
		2
		3.3
		5
		2.8
		2.9
		2.6
		3.7
		4.3
		4.3
		2
		2.7
		2.1
		3.8
		2.1
		3.2
		1.5
		2.6
		3.5
		1.6
		3.7
		3.4
		2.7
		5.6
		1.2
		4.4
		1.1
		1.8
		2.4
		5
		3.2
		2.3
		3.8
		4.8
		3.2
		1.4
		2
		1.6
		5.8
		4
		3
		3.3
		3.3
		2.8
		1.9
		4
		4.4
		5
		1.9
		2.6
		4
		5.1
		6
		6.9
		2.9
		4.9
		3.8
		3.7
		6.7
		4.3
		4.6
		1.8
		2
		5.2
		3.5
		3.4
		3.3
		2.3
		4.1
		1.9
		3.1
		3.8
		6.3
		3.6
		2.6
		5.3
		1.9
		8.2
		8.1
		2.2
		5.5
		1.2
		2.3
		1.1
		2.4
		2
		1.6
		3
		4.7
		1.7
		4.8
		4
		2.5
		4.3
		2.7
		1.2
		2.5
		2.4
		5.5
		2.2
		2
		1.8
		3.6
		2.6
		6
		5
		8.9
		5.6
		3.6
		6.2
		3.2
		3
		2.4
		3.1
		3.3
		5.3
		2.6
		1.9
		2.2
		3.2
		3.6
		2.6
		1.5
		3.8
		1.9
		2
		2.5
		3.7
		4.4
		2.7
		6.9
		3.2
		1.2
		1.8
		3.9
		3.4
		1.5
		2.9

## Sheet: Figure 2A Chart Data
Figure 2A - eIF2alpha confirmation
	GAL4 only latency		UAS only latency		eIF2alpha knockdown
	2.9		1.9		1.26667
	1.06667		1.43333		3.06667
	4.2		2.1		3.23333
	2.2		1.2		1.2
	3.3		3.6		2.16667
	4.6		2.16667		3.4
	3.36667		1.76667		0.966667
	2.5		1.26667		4.43333
	1.96667		4.6		0.9
	5.06667		1.43333		11
	1.26667		1.86667		2.93333
	4.53333		2.26667		4.13333
	1.8		1.23333		1.9
	2.4		2.23333		11
	4.16667		3.06667		2.5
	4.3		1.43333		5.56667
	3.2		3.23333		5.7
	2.73333		1.56667		3.96667
	0.933333		4.86667		11
	5.13333		3.26667		5.86667
	1		1.76667		2.13333
	2.33333		3		1.83333
	0.966667		2.43333		1.9
	2.06667		1.73333		5.3
	1.06667		8.5		1.7
	2.46667		2.36667		11
	3.36667		2.06667		7.43333
	1.96667		3		11
	2.43333		5.5		6.7
	1.5		2.5		2.13333
	1.2		3.63333		2.4
	3.9		6.1		1.5
	1.9		1.66667		2.53333
	5.43333		11		4.73333
	1.7		1.26667		11
	6.93333		1.86667		5.7
	2.86667		2.86667		11
	8.23333		3.73333		11
	2.43333		2.76667		11
	2.73333		1.83333		7.56667
	1.9		2.56667		5.26667
	1.96667		2.03333		11
	3.43333		4.53333		6
	3.4		1.7		9.56667
	5.63333		2.7		11
	3.13333		2.43333		11
	7.43333		3.26667		11
	2.3		1		8.6
	2.667		3.36667		2.3
	4.133		2.5		6.06667
mean	3.08267		2.844		5.75133
n	50		50		50

## Sheet: Figure 2B Chart Data
Figure 2B - eIF4A confirmation
	GAL4 only latency		UAS only latency		eIF4A knockdown
	0.6		1.7		0.4
	0.6		3.9		0.7
	0.9		3.4		0.7
	0.9		5.8		0.9
	0.9		4		1.1
	0.9		5		1.2
	1		1.7		1.3
	1		11		1.4
	1		2.2		2.1
	1		0.7		2.3
	1.1		2.7		2.5
	1.1		1.7		2.5
	1.2		6		2.7
	1.2		4.2		2.7
	1.2		5		2.8
	1.2		3		3.1
	1.2		2.4		3.1
	1.4		6		3.2
	1.4		3.3		3.3
	1.4		1.8		3.3
	1.4		4.1		3.4
	1.4		3.6		3.4
	1.5		0.8		3.5
	1.5		2		3.6
	1.6		1.4		3.7
	1.6		3.7		3.7
	1.6		5.1		3.8
	1.8		3.6		4
	1.8		2.5		4.1
	1.8		3		4.1
	1.8		3.1		4.1
	1.8		2.6		4.1
	1.8		1.9		4.2
	1.9		3.8		4.2
	1.9		8.3		4.3
	1.9		1.3		4.4
	1.9		2.1		4.6
	1.9		4.1		4.6
	2		2.8		5
	2		2.9		5.1
	2		2.8		5.3
	2.1		5.6		5.3
	2.3		6.8		5.4
	2.3		4.2		5.7
	2.3		1.9		5.8
	2.6		1.5		5.9
	2.7		6.5		6
	2.7		4.9		6.3
	2.8		5.3		6.7
	2.9		1.8		7.7
	3.3		3.4		7.9
	4.1		3.8		7.9
	4.3		3		8
	4.7		2.4		8
			5.3		8
			5.2		8.3
					8.8
					9.1
					9.31
					9.5
					9.6
					9.7
					9.9
					10
					11
					11
					11
					11
					11
mean	1.8		3.61786		5.25087
n	53		55		68

## Sheet: Figure 2C Chart Data
Figure 2C - eIF4AIII confirmation
	GAL4 only latency		UAS only latency		eIF4AIII knockdown
	3.3		1.7		2.3
	2.8		6.5		6.9
	3.6		3.5		1.5
	2.8		4.3		6.3
	3.8		5.1		11
	6.5		2.3		5.9
	2.9		3.6		3.9
	1.8		1.8		8.1
	1.3		3.2		8.1
	2		2		8
	5.3		7		7.3
	2.1		3.5		4.6
	1.5		2.1		8.1
	3.7		2.2		3.4
	4.4		2.5		5
	4.3		1.5		6.5
	2.6		2.1		8.6
	5.6		1.7		2.5
	2.2		2.5		8
	1.5		3.5		2.8
	2.4		9.9		11
	1.1		5.8		8
	5.2		2.1		6.8
	1.8		4.9		2
	1.7		1.8		11
	3.2		4.4		4.1
	2.4		1.6		3.6
	2		1.8		9.4
	1.3		1.3		11
	3.1		1.1		3.9
	3.2		2.4		3.1
	3.8		1.6		7.9
	1.4		4.7		3.5
	1.7		2.4		11
	3		3.3		3.4
	1.7		3		1.3
	3.8		1.7		2.1
	2		2.1		2.5
	2		2		5.6
	2.5		3		3.6
	1.5		1.5		6.9
	3.1		1.4		2.7
	1.7		3.2		5.9
	2.3		1.1		1.6
	2.2		1.9		11
	2.1				11
	2.9				11
					11
					3.3
					11
Mean	2.74681		2.94667		6.18
n	46		44		50

## Sheet: Figure 2D Chart Data
Figure 2D - eIF4G2 confirmation
	GAL4 only latency		UAS only latency		eIF4G2 knockdown
	0.9		0.8		11
	0.9		0.9		1.4
	1		1		1.8
	1		1.1		1.9
	1		1.1		1.9
	1		1.1		2.3
	1		1.2		2.4
	1.1		1.2		2.5
	1.3		1.2		2.6
	1.3		1.3		2.7
	1.3		1.3		2.7
	1.3		1.4		2.8
	1.4		1.4		2.8
	1.4		1.5		2.8
	1.5		1.5		3
	1.5		1.6		3.1
	1.5		1.7		3.1
	1.5		1.7		3.2
	1.5		1.7		3.3
	1.6		1.8		3.5
	1.7		1.8		3.8
	1.8		1.9		3.8
	1.8		2		3.8
	1.9		2		4
	2		2		4.1
	2.1		2		4.1
	2.1		2.1		4.2
	2.2		2.1		4.2
	2.2		2.1		4.2
	2.3		2.1		4.3
	2.3		2.2		4.5
	2.3		2.2		4.7
	2.3		2.2		4.8
	2.4		2.3		4.8
	2.4		2.3		4.9
	2.4		2.3		5
	2.4		2.3		5.3
	2.5		2.3		5.5
	2.5		2.4		5.5
	2.5		2.5		5.6
	2.5		2.5		5.6
	2.5		2.6		5.6
	2.6		2.6		5.6
	2.7		2.7		5.6
	2.7		2.7		6.1
	2.8		2.7		6.1
	2.8		2.8		6.4
	2.9		2.9		6.7
	3		3.1		6.7
	3.1		3.1		6.8
	3.1		3.1		6.8
	3.1		3.2		7.1
	3.2		3.3		7.1
	3.2		3.3		7.5
	3.4		3.4		7.5
	3.5		3.5		7.8
	3.5		3.7		9.6
	3.6		3.8		10
	3.6		4.1		10.2
	4		4.2		10.7
	4		4.3		10.7
	4		4.3		10.8
	4.1		4.3		11
	4.2		4.4		11
	4.3		4.5		11
	4.4		4.5		11
	4.8		4.5		11
	4.8		4.5		11
	4.8		4.5		11
	4.9		4.5		11
	5		4.7		11
	5.4		4.7		11
	5.5		4.9
	5.6		4.9
	5.7		5.1
	6.4		5.1
	7.6		5.3
	9		5.3
	11		5.4
			5.5
			6
			6
			6.1
			6.3
			6.4
			6.7
			6.9
			7
			7.1
			7.4
			8.1
			8.5
			8.6
			9
			9.2
			10.3
			11
			11
			11
			11
			11
			11
Mean	2.99241		4.05588		5.95694
n	78		101		71

## Sheet: Figure 2E Chart Data
Figure 2E - eIF4G2 confirmation
	GAL4 only latency		UAS only latency		eIF4G2 knockdown
	2.4		6.3		2.6
	1.7		9.9		3.1
	4.8		6		5.4
	4.1		11		5
	1.4		3.3		4.9
	2.5		8.1		5.4
	2.1		6.4		4.4
	3.2		7.1		4.5
	2		5.2		4
	5.5		1.7		3.4
	2.8		5.6		7.7
	4		3		2.6
	2.4		2.9		6.6
	3.6		1.7		4.8
	11		5.1		2.9
	4.8		2.3		1.9
	3.6		1.9		5.2
	4.9		8.2		1.8
	4.4		5.7		8
	6.4		4.2		6.4
	3.1		5.3		7
	9		5.5		3.8
	1		1		6.8
	2.6		2.1		10
	2.5		4.8		2.8
	2.8		2.8		11
	1.5		2.5		5.8
	5.6		3.4		4.4
	2.7		1.8		5.5
	2.9		6.7		4
	1.3		4.5		2.2
	2.2		4.2		9.2
	0.9		4.3		11
	2.3		3.1		2.2
	2.4		3.7		8.7
	1.1		6.1		8.4
	1.3		7.7		6.3
	2.2		1.8		5.1
	3.1		4.1		2.3
	3.5		2.5		6.8
	1		2.4		4.2
	1.5		1.5		4.7
	2.1		1.7		2.6
	3.5		9.4		5.1
	5.7		4.2		5.9
	1		2.9		1.4
	1.4		1.5		2.7
	1		2.2		3.4
	4.2		2.3		2.9
	2.5		5.2		5.6
	3		5.6		3.5
	2.5		6.1		11
	1.8		8.2		4.3
	1.9		1		3.8
	1.5		11		9.3
	0.9		5.5		3.2
	4		5.1		2
	3.2		5.6		2.4
	2.5		2.6		7.1
	3.1		5.7		3.2
	1.3		4.3		5.7
	2.4		2.1		6.2
	1.8		1.2		7.8
	2.7		1.1		2.5
	2.3		4.8		2.6
	1.5		1.3		5.7
	4		1.6		7.1
	1.6		2.3		3
	4.8		3.6		3
	4.3		0.8		6
	7.6		1.6		3.8
	3.4		4.7		2.5
	5.4		4.3		6.5
	1.5		3.8		1.4
	1		2.9		5.2
	2.3		4.9		3.9
	2.3		4.7		4.3
	5		1.6		11
	1.3		2.1		4.7
			1.9		5.5
			4.1		11
			3.8		3.4
			1.6		11
			3.3		4.3
			7.2		6.2
			5.4		5.3
			3.5		3.2
			5.1		2.8
			4		9.2
					5.5
					3.4
					7.1
					5
					2.6
					4.2
					4.1
					2.3
					4.8
					6.9
					9
					7.1
Mean	2.99241		4.13797		5.00127
N	78		87		100

## Sheet: Figure 2F Chart Data
Figure 2F - mbl confirmation
	GAL4 only latency		UAS only latency		mbl knockdown
	1.167		2.033		3.2
	1.8		4.767		6.333
	2.067		3.3		5
	2.033		2.6		5.8
	1.4		1.167		7.8
	1.433		2.067		5.667
	1.3		1.233		7.667
	1.833		1.667		3
	1.433		1.933		5.9
	1.467		2.3		4.667
	2.767		1.6		6.1
	2.6		1.033		2.633
	1.967		3.133		2.4
	1.167		1.433		1.933
	1.267		3		2.167
	2.033		2.9		2.333
	2		1.033		2.4
	1.433		1.9		6.033
	2.933		1.133		2.333
	1.367		1.233		3.433
	3.4		1.767		2.933
	3.167		1.867		5.167
	2.833		1.633		5.567
	1.833		3.233		8.033
	2		2.067		1.867
	2.767		3.333		3.1
	3.7		1.767		2.033
	2.6		3.9		3
	2.967		1.267		8.333
	1.5		2.833		5.033
	1.767		3.567		1.267
	1.3		4.067		2.067
	1.4		2.333		1.133
	2.833		2.533		1.833
	3.067		1.433		3.933
	2.4		2.567		4.2
			3.2		3.2
			1.333		3.967
			1.467		2
					4.767
					3.933
					1.267
					5.933
					5.167
					5.667
					7.533
					1.833
					8.533
Mean	2.08336		2.24697		4.16871
n	35		38		47

[truncated: 5 more sheets: Figure 2G Chart Data, Figure 2H Chart Data, Figure 3A Chart Data, Figure 3B Chart Data, Figure 3C Chart Data]
