# Supplementary material for: A nociceptor-specific RNAi screen in Drosophila larvae identifies RNA-binding proteins that regulate thermal nociception
Source: PeerJ. 2025 Jan 21;13:e18857. doi: 10.7717/peerj.18857 (PMC11759608; doi:10.7717/peerj.18857)
Supplement: Supplemental Information 2 — Each row indicates the line ID, stock ID, and library information for RNAi line used in the RNAi screen. [file peerj-13-18857-s002.xlsx]

## Sheet: Figure 1
CG#	Gene Name	Gene Symbol	Construct/Transgene ID	Stock ID	Library
CG3193	crooked neck	crn	15799	39335	VDRC GD
CG5454	small ribonucleoprotein particle U1 subunit C	snRNP-U1-C	11660	22132	VDRC GD
CG12924	Lsm11	Lsm11	106807	108336	VDRC KK
CG8241	peanuts	pea	14810	47782	VDRC GD
CG10418	CG10418	CG10418	107632	105940	VDRC KK
CG12085	half pint	hfp	7475	20144	VDRC GD
CG7437	mushroom-body expressed	mub	108209	105495	VDRC KK
CG9998	U2 small nuclear riboprotein auxiliary factor 50	U2af50	13809	24176	VDRC GD
CG8144	pasilla	ps	14506	24214	VDRC GD
CG7269	Helicase at 25E	Hel25E	12189	22557	VDRC GD
CG5931	Brr2 U5 snRNP complex subunit	Brr2	9881	43962	VDRC GD
CG14641	CG14641	CG14641	8388	38790	VDRC GD
CG6841	pre-mRNA processing factor 6	Prp6	10654	34254	VDRC GD
CG2926	CG2926	CG2926	9856	33589	VDRC GD
CG10445	CG10445	CG10445	104753	107890	VDRC KK
CG6227	pre-mRNA processing factor 5	Prp5	108174	110778	VDRC KK
CG3582	U2 small nuclear riboprotein auxiliary factor 38	U2af38	108210	110075	VDRC KK
CG31762	bruno 1	bru1	110026	107459	VDRC KK
CG16941	Splicing factor 3a subunit 1	Sf3a1	9241	20338	VDRC GD
CG12749	Heterogeneous nuclear ribonucleoprotein at 87F	Hrb87F	7818	51759	VDRC GD
CG11360	CG11360	CG11360	7278	38491	VDRC GD
CG8749	small ribonucleoprotein particle U1 subunit 70K	snRNP-U1-70K	13212	23150	VDRC GD
CG6197	fandango	fand	101751	104186	VDRC KK
CG10851	B52	B52	8690	38860	VDRC GD
CG10210	twister	tst	6902	38356	VDRC GD
CG5442	SC35	SC35	112717	104978	VDRC KK
CG10128	transformer 2	tra2	768	8868	VDRC GD
CG16724	transformer	tra	764	2560	VDRC GD
CG8019	haywire	hay	4213	41023	VDRC GD
CG4528	sans fille	snf	107649	104334	VDRC KK
CG12759	DEAD box protein 45A	Dbp45A	101176	104183	VDRC KK
CG9696	domino	dom	1420	7787	VDRC GD
CG7185	Cleavage and polyadenylation specific factor 6	Cpsf6	108487	107147	VDRC KK
CG4119	CG4119	CG4119	11222	26395	VDRC GD
CG9075	eukaryotic translation initiation factor 4A	eIF4A	14111	42202	VDRC GD
CG4602	Splicing regulatory protein 54	Srp54	10663	51088	VDRC GD
CG33197	muscleblind	mbl	107778	105486	VDRC KK
CG31061	Gustatory receptor 98d	Gr98d	106596	106079	VDRC KK
CG9218	smooth	sm	108588	108351	VDRC KK
CG10084	second mitotic wave missing	swm	100111	105950	VDRC KK
CG17492	mind bomb 2	mib2	102219	108947	VDRC KK
CG17686	DISCO Interacting Protein 1	DIP1	105102	108186	VDRC KK
CG9680	Dead box protein 73D	Dbp73D	102538	108310	VDRC KK
CG10203	x16 splicing factor	x16	107171	100226	VDRC KK
CG6866	loquacious	loqs	100016	108358	VDRC KK
CG6375	pitchoune	pit	106435	106078	VDRC KK
CG13425	Heterogeneous nuclear ribonucleoprotein K	HnRNP-K	106619	105271	VDRC KK
CG5605	eukaryotic translation release factor 1	eRF1	4704	45027	VDRC GD
CG10719	brain tumor	brat	113206	105054	VDRC KK
CG6539	Gemin 3	Gem3	17221	49506	VDRC GD
CG32423	alan shepard	shep	5125	37863	VDRC GD
CG33100	eukaryotic translation initiation factor 4E homologous protein	eIF4EHP	7071	38399	VDRC GD
CG16901	squid	sqd	8593	32395	VDRC GD
CG9054	Dead-box-1	Ddx1	100273	103365	VDRC KK
CG6779	Ribosomal protein S3	RpS3	109080	106321	VDRC KK
CG4792	Dicer-1	Dcr-1	100297	106041	VDRC KK
CG33106	multiple ankyrin repeats single KH domain	mask	100529	103411	VDRC KK
CG8730	drosha	drosha	105813	108026	VDRC KK
CG9412	rasputin	rin	108430	109911	VDRC KK
CG6999	CG6999	CG6999	10656	41828	VDRC GD
CG9809	spargel	srl	100201	103355	VDRC KK
CG4396	found in neurons	fne	108902	101508	VDRC KK
CG5637	nanos	nanos	105687	108900	VDRC KK
CG9755	pumilio	pum	14303	45815	VDRC GD
CG9373	rumpelstiltskin	rump	14202	44658	VDRC GD
CG6203	Fragile X messenger ribonucleoprotein 1	Fmr1	1288	8933	VDRC GD
CG14648	lost	lost	102938	110736	VDRC KK
CG11334	CG11334	CG11334	102802	109672	VDRC KK
CG5589	aramis	ais	102370	108642	VDRC KK
CG14718	CG14718	CG14718	104564	105543	VDRC KK
CG32706	CG32706	CG32706	116132	109212	VDRC KK
CG6961	CG6961	CG6961	114826	109951	VDRC KK
CG6418	CG6418	CG6418	100661	108552	VDRC KK
CG18259	CG18259	CG18259	17767	50094	VDRC GD
CG40351	SET domain containing 1	Set1	12893	40683	VDRC GD
CG5168	WD repeat and FYVE domain containing 2	Wdfy2	101897	110451	VDRC KK
CG5705	mitochondrial translation release factor 1	mRF1	107615	108376	VDRC KK
CG10777	maheshvara	mahe	104345	109465	VDRC KK
CG7903	CG7903	CG7903	103182	106475	VDRC KK
CG11505	La-related protein 4B	Larp4B	100069	105949	VDRC KK
CG8053	eukaryotic translation initiation factor 1A	eIF1A	108681	100611	VDRC KK
CG9946	eukaryotic translation initiation factor 2 subunit alpha	eIF2α	100282	104562	VDRC KK
CG4153	eukaryotic translation initiation factor 2 subunit beta	eIF2β	108791	105291	VDRC KK
CG8882	eukaryotic translation initiation factor 3 subunit i	eIF3i	107698	103141	VDRC KK
CG8636	eukaryotic translation initiation factor 3 subunit g1	eIF3g1	110954	105325	VDRC KK
CG9769	eukaryotic translation initiation factor 3 subunit f1	eIF3f1	109245	101465	VDRC KK
CG4878	eukaryotic translation initiation factor 3 subunit b	eIF3b	101318	107829	VDRC KK
CG10124	eukaryotic translation initiation factor 4E4	eIF4E4	105485	107595	VDRC KK
CG8280	eukaryotic translation elongation factor 1 alpha 1	eEF1α1	109406	104502	VDRC KK
CG1873	eukaryotic translation elongation factor 1 alpha 2	eEF1α2	112310	102736	VDRC KK
CG6946	glorund	glo	GL00438	36066	TRiP Collection
CG5263	smaug	smg	GL00406	35477	TRiP Collection
CG10868	oo18 RNA-binding protein	orb	JF01864	25843	TRiP Collection
CG6493	Dicer-2	Dcr-2	JF02636	27486	TRiP Collection
CG4262	embryonic lethal abnormal vision	elav	JF03008	28371	TRiP Collection
CG6137	aubergine	aub	GL00076	35201	TRiP Collection
CG1691	IGF-II mRNA-binding protein	Imp	HMS01168	34977	TRiP Collection
CG10293	held out wings	how	HMC03820	55665	TRiP Collection
CG42320	Darkener of apricot	Doa	HMC04193	55908	TRiP Collection
CG17454	Splicing factor 30	Spf30	GL01543	43199	TRiP Collection
CG5422	Rox8	Rox8	JF02870	28035	TRiP Collection
CG9177	eukaryotic translation initiation factor 5	eIF5	HMS00159	34841	TRiP Collection
CG10840	eukaryotic translation initiation factor 5B	eIF5B	GL01593	44418	TRiP Collection
CG10837	eukaryotic translation initiation factor 4B	eIF4B	HMS04503	57305	TRiP Collection
CG10306	eukaryotic translation initiation factor 3 subunit k	eIF3k	HMC02415	44493	TRiP Collection
CG7483	CG7483	CG7483	HMS00442	32444	TRiP Collection
CG10811	eukaryotic translation initiation factor 4G1	eIF4G1	HMS00762	33049	TRiP Collection
CG5728	Ribosomal RNA Processing 5	Rrp5	HMC04202	55916	TRiP Collection
CG10279	Rm62	Rm62	JF01385	31395	TRiP Collection
CG12413	mitochondrial translation initiation factor 2	mIF2	GL01267	41839	TRiP Collection
CG4035	eukaryotic translation initiation factor 4E1	eIF4E1	HMS00969	34096	TRiP Collection
CG10192	eukaryotic translation initiation factor 4G2	eIF4G2	GL00469	35809	TRiP Collection
CG3845	NAT1	NAT1	HMS00348	32357	TRiP Collection
CG7883	eukaryotic translation initiation factor 2B subunit alpha	eIF2Balpha	HMC03768	55624	TRiP Collection
CG8023	eukaryotic translation initiation factor 4E3	eIF4E3	GL01177	42804	TRiP Collection
CG6995	Scaffold attachment factor B	Saf-B	HMC03311	51759	TRiP Collection
CG9124	eukaryotic translation initiation factor 3 subunit h	eIF3h	GL01831	55603	TRiP Collection
CG11266	Caper	Caper	11266R-3	11266R-3	NIG-Fly
CG17540	Spf45	Spf45	17540R	17540R	NIG-Fly
CG5439	CG5439	CG5439	5439R-1	5439R-1	NIG-Fly
CG3056	sister-of-Sex-lethal	ssx	3056R-1	3056R-1	NIG-Fly
